# Supplementary material
Source: PubMed Central journal article supplement (PMC3183129)

reported significantly greater energy expenditure from physical activity than participants in the three other weight categories.

- C. Self-reported daily calorie intake in year 4 for the ILI participants who had lost  $\geq 10\%$  at 1 year and were in the subset of 502 ILI participants who completed the Food Frequency Questionnaire at year 4. Participants are shown based upon their weight change category at year 4: lost  $\geq 10\%$  of initial weight (N = 209), 5.0-9.9% (N = 140), or 0-4.9% (N = 103) or gained above baseline weight (N = 50). Participants who had a 10% loss at year 4 reported a significantly lower calorie intake than those who gained above their baseline.

**Suppl Figure 1. Weight loss trajectories over 4 years in the 370 participants in the Intensive Lifestyle Intervention (ILI) who, at year 1, lost  $\geq 15\%$  of initial weight. These 370 individuals represent a subset of the 877 who lost  $\geq 10\%$  of initial weight. The figure shows the number of participants who, at year 4, maintained a loss of 15% or more of initial weight (N = 107), of 10.0-14.9% (N = 116), of 5.0-9.9% (N = 82), or of 0-4.9% (N = 43) or who gained above their baseline weight (N = 22). The percentages shown in parentheses are based on the sample size for the subgroup. Thus, the 107 of 370 participants who maintained a 15% loss at year 4 comprised 28.9% of this subgroup of participants.**

## Supplementary Figure 1

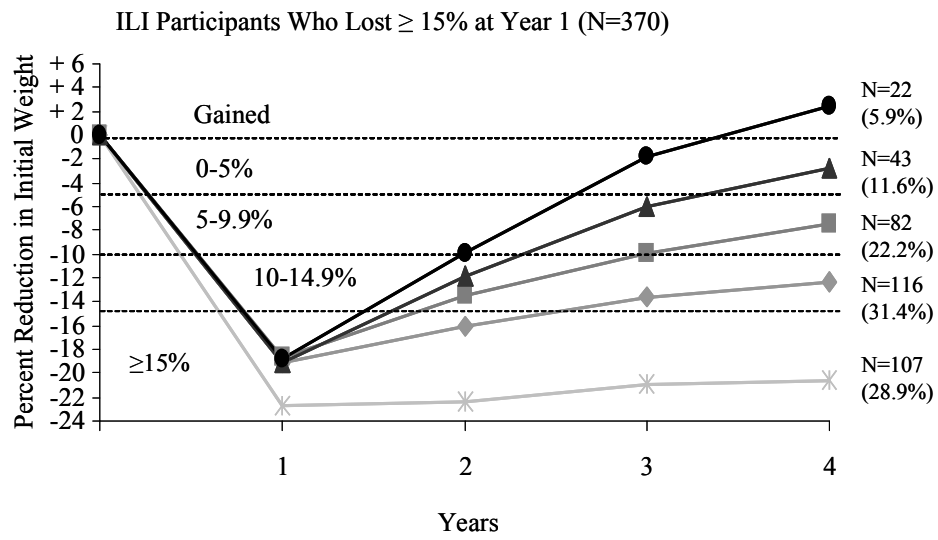

Type of file: figure

Label: Figure 1

Filename: LA-P117SupplFigure1.doc

## Supplementary Figure 1



Supplement: NIHMS313515-supplement-supplement_1.pdf [file NIHMS313515-supplement-supplement_1.pdf]
